# Supplementary material for: Confidential Enquiry into Maternal Deaths in Namibia, 2018–2019: A Local Approach to Strengthen the Review Process and a Description of Review Findings and Recommendations
Source: Springer Nature journal article supplement (doi:10.1007/s10995-023-03771-9), 2023-09-30
Supplement: MOESM1 [file 26109344]

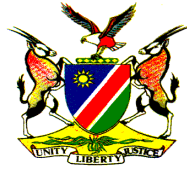

Republic of Namibia  
Ministry of Health and Social Services

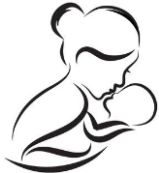

## CONFIDENTIAL MATERNAL DEATH REVIEW FORM

**NOTE:**

1. This form must be completed for all maternal deaths, including deaths from abortion and ectopic gestation related deaths in pregnant women or within 42 days after termination of pregnancy irrespective of duration or site of pregnancy.
2. Circle number where applicable.
3. To be completed by a Medical Practitioner or Registered or Enrolled Nurse/Midwife or the in charge of the unit where the death occurred.
4. Complete the original form. The original remains at the facility where death occurred and two copies must be sent simultaneously to the Regional and National Maternal, Stillbirth and Neonatal Death Review Committee Secretariats *within 7 days of the review*.
5. Attach a copy of the maternal record (ANC or health passport and hospital records). In the copy of the case record, patient's names and all names of health care workers should be crossed out with a black marker to enable a confidential review of the case.
6. Fill in all information that is available. Write N/A if not available or not applicable.
7. Woman's name should not be mentioned but a unique identifier should be given:
  - 1-2 Abbreviation of region, (e.g. KU, ER, OS, HA etc.)
  - 3-4 Month of death (e.g. 05, 12 etc.)
  - 5-6 Year of death (e.g. 21, 19, etc.)
  - 7-8 Initials of patient or woman in case of stillborn or neonatal death (e.g. AM, SS, TE etc.)
  - 9-10 Year of birth patient or woman in case of stillborn or neonatal death (e.g. 89, 91, 07 etc.)

**For example:**

Ms Anna Petrus, DOB 23-05-1987, died on 4 April 2017 in Kunene region will be KU-04-17-AP-87

8. Contact details for National Level:  
Division Quality Assurance:

email: \_\_\_\_\_ Fax \_\_\_\_\_

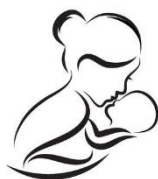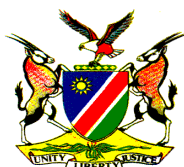

REPUBLIC OF NAMIBIA

MINISTRY OF HEALTH AND SOCIAL SERVICES

## CONFIDENTIAL MATERNAL DEATH REVIEW FORM

Woman's name should not be mentioned but a unique identifier should be given:

Unique identifier:

Example: Anna Petrus, DOB 23-05-1987, died on 4 April 2017 in Kunene will be KU 04 17 AP 87

|                  |  |                |  |               |  |                   |  |                       |  |
|------------------|--|----------------|--|---------------|--|-------------------|--|-----------------------|--|
|                  |  |                |  |               |  |                   |  |                       |  |
| Reporting Region |  | Month of death |  | Year of death |  | Initials of Woman |  | Woman's year of birth |  |

1) **Reporting Facility Name:** \_\_\_\_\_

2) **Region of reporting Facility:**

- |                     |                  |                      |
|---------------------|------------------|----------------------|
| 1 Erongo (ER)       | 6 Khomas (KH)    | 11 Oshana (OS)       |
| 2 Hardap (HA)       | 7 Kunene (KU)    | 12 Oshikoto (OK)     |
| 3 Karas (KA)        | 8 Ohangwena (OH) | 13 Otjozondjupa (OT) |
| 4 Kavango East (KE) | 9 Omaheke (OM)   | 14 Zambezi (ZA)      |
| 5 Kavango West (KW) | 10 Omusati (OU)  | 99 Unknown (UN)      |

### A. Maternal Demographic details

3) **Woman's Initials:** \_\_\_\_ - \_\_\_\_

4) **Date of Birth:** \_\_\_\_ / \_\_\_\_ / \_\_\_\_ (dd/mm/yyyy)

5) **Age:** \_\_\_\_

6) **Marital Status:** 1 Married 2 Single 99 Unknown

7) **Nationality:** 1 Namibian 2 Non-Namibian 99 Unknown

8) **Employment:** 1 Employed (incl. self-employed) 2 Unemployed 99 Unknown

9) **Admission to facility:**

1. Date \_\_\_\_ / \_\_\_\_ / \_\_\_\_ (dd/mm/yyyy) 99 Unknown

2. Time \_\_\_\_ h \_\_\_\_ 99 Unknown

10) **Status on admission:** 1 Stable 2 Critically ill 3 Dead on arrival

11) **Reason for referral:** \_\_\_\_\_

12) **Referred from:**

- |                        |                         |                    |
|------------------------|-------------------------|--------------------|
| 1 Self referred (home) | 4 District Hospital     | 7 Private facility |
| 2 Health Clinic        | 5 Intermediate Hospital |                    |
| 3 Health Centre        | 6 National Hospital     | 99 Unknown         |

13) **Name of Referring facility:** \_\_\_\_\_

14) *Region of Referring facility:*

- |                     |                  |                      |
|---------------------|------------------|----------------------|
| 1 Erongo (ER)       | 6 Khomas (KH)    | 11 Oshana (OS)       |
| 2 Hardap (HA)       | 7 Kunene (KU)    | 12 Oshikoto (OK)     |
| 3 Karas (KA)        | 8 Ohangwena (OH) | 13 Otjozondjupa (OT) |
| 4 Kavango East (KE) | 9 Omaheke (OM)   | 14 Zambezi (ZA)      |
| 5 Kavango West (KW) | 10 Omusati (OU)  | 99 Unknown (UN)      |

## B. Maternal Medical History

- 15)
- Woman's Body Parameters:*
- |                        |                 |
|------------------------|-----------------|
| 1 Height _____ cm      | 3 MUAC _____ cm |
| 2 Last Weight _____ kg | 99 Unknown      |

- 16)
- Last haemoglobin prior to admission:*
- 1 \_\_\_\_\_ g/dl 99 Unknown

17) *Past Medical History:*

- |                                 |                     |                           |
|---------------------------------|---------------------|---------------------------|
| 1 Hypertension                  | 6 GIT Disorder      | 11 Epilepsy               |
| 2 Cardiac Disease               | 7 Diabetes Mellitus | 12 Mental Health Disorder |
| 3 Respiratory Disease (Chronic) | 8 Anaemia           | 13 Others (Specify)       |
| 4 Renal Disease                 | 9 DVT / PE          | _____                     |
| 5 Liver Disease                 | 10 TB               | <b>14 None</b>            |
|                                 |                     | 99 Unknown                |

18) *Past Surgical or Trauma History:*

- |                 |                                                 |                    |
|-----------------|-------------------------------------------------|--------------------|
| 1 Myomectomy    | 4 3 <sup>rd</sup> / 4 <sup>th</sup> degree Tear | 7 Poly trauma      |
| 2 Salpingectomy | 5 Laparotomy (not C/S)                          | 8 Others (Specify) |
| 3 ERPOC / MVA   | 6 Pelvic Injury                                 | _____              |
|                 |                                                 | <b>9 None</b>      |
|                 |                                                 | 99 Unknown         |

## C. Obstetric (Antenatal) details

- 19)
- Gravidity:*
- \_\_\_\_\_ [at start of current pregnancy – all pregnancies including previous abortions]

- 20)
- Parity:*
- \_\_\_\_\_ [number of babies delivered > 28weeks or >1000g (dead or alive). excl current pregnancy]

- 21)
- Number of live children:*
- \_\_\_\_\_

- 22)
- Number of previous pregnancy losses (<13 weeks):*
- \_\_\_\_\_ [at start of current pregnancy]

- 23)
- Number of previous pregnancy losses (≥13 - <28 weeks):*
- \_\_\_\_\_ [at start of current pregnancy]

- 24)
- Number of previous Stillbirths (≥28 weeks):*
- \_\_\_\_\_ [at start of current pregnancy]

- 25)
- Number of previous Caesarean Sections:*
- \_\_\_\_\_ [at start of current pregnancy]

- 26)
- Did woman attend Antenatal Care:*
- 1 Yes\* 2 No 99 Unknown

- 27)
- \*If yes, how many contacts:*
- \_\_\_\_\_

- 28)
- Timing of 1<sup>st</sup> contact*
- |                          |                                       |                                  |            |
|--------------------------|---------------------------------------|----------------------------------|------------|
| 1 1st Trimester (<13wks) | 2 2 <sup>nd</sup> Trim. (≥13 – 27wks) | 3 3 <sup>rd</sup> Trim. (≥28wks) | 99 Unknown |
|--------------------------|---------------------------------------|----------------------------------|------------|

29) *Special Investigations:*

|                    |            |            |                                 |
|--------------------|------------|------------|---------------------------------|
| =                  | 1 Negative | 2 Positive | 99 Unknown                      |
| Antibodies present | 3 No       | 4 Yes      | 99 Unknown                      |
| Hep B              | 1 Negative | 2 Positive | 3 Declined Test 99 Unknown      |
| RPR                | 1 Negative | 2 Positive | 3 Declined Test 99 Unknown      |
| Treatment given    | 4 No       | 5 Yes      | 6 Declined Treatment 99 Unknown |
| HIV                | 1 Negative | 2 Positive | 3 Declined Test 99 Unknown      |
| Treatment given    | 4 No*      | 5 Yes**    | 99 Unknown                      |

- 30) **\*If NOT on ARVS:** 1. Not yet started 2. Declined ARVs 3. Defaulted 99. Unknown
- 31) **\*\*If HIV Positive: Treatment started when?**  
1 Pre pregnancy 2 This pregnancy at \_\_\_\_\_ weeks 99 Unknown
- 32) **If HIV Positive: Latest Test:**  
1 Latest CD4 Count # \_\_\_\_\_ / \_\_\_\_\_ / \_\_\_\_\_ (dd/mm/yyyy) 99 Unknown  
2 Latest Viral Load # \_\_\_\_\_ / \_\_\_\_\_ / \_\_\_\_\_ (dd/mm/yyyy) 99 Unknown
- 33) **TB Preventative therapy (TPT) given:**  
1 Yes \_\_\_\_\_ Started \_\_\_\_\_ / \_\_\_\_\_ / \_\_\_\_\_ (dd/mm/yyyy) 4 Defaulted  
2 No 3 Declined Treatment 99 Unknown

## D. Obstetric details (delivery, termination, miscarriage)

- 34) **Place of delivery, miscarriage or termination\*:**  
1 Home (incl BBA) 5 Intermediate Hospital 66 Undelivered  
2 Health Clinic 6 National Hospital 88 Transfer between facilities  
3 Health Centre 7 Private facility 99 Unknown  
4 District Hospital

\* If miscarried, terminated or undelivered – skip to Question 42

- 35) **Delivery details:** (if more than triplets, please add details at bottom of page)

|   |            |                                    |            |
|---|------------|------------------------------------|------------|
| 1 | First Baby | _____ / _____ / _____ (dd/mm/yyyy) | 99 Unknown |
|   | Time       | _____ h _____                      | 99 Unknown |
| 2 | Twin 2     | _____ / _____ / _____ (dd/mm/yyyy) | 99 Unknown |
|   | Time       | _____ h _____                      | 99 Unknown |
| 3 | Triplet 3  | _____ / _____ / _____ (dd/mm/yyyy) | 99 Unknown |
|   | Time       | _____ h _____                      | 99 Unknown |

- 36) **Gestational age at delivery:** 1 <28 weeks 2 ≥28 weeks at \_\_\_\_\_ /40 99 Unknown
- 37) **Did labour occur:** 1 Yes 2 No 99 Unknown
- 38) **Was labour induced:** (circle all that apply)  
1 Artificial rupture of membranes 3 Prostaglandins 5 Oxytocin  
2 Mechanical 4 Misoprostol 99 Unknown
- 39) **Was labour augmented:** (tick all that apply)  
1 No 2 Yes 3 Medication used \_\_\_\_\_  
99 Unknown
- 40) **Was Labour Care Guide used:**  
1 Yes, used correctly 2 Yes, incomplete 3 No, not used 4 Not in labour 99 Unknown
- 41) **Please indicate duration:** (where known)  
1 Latent phase (<5cm) \_\_\_\_\_ / \_\_\_\_\_ hours / mins 99 Unknown  
2 Active phase (5-10cm) \_\_\_\_\_ / \_\_\_\_\_ hours / mins 99 Unknown  
3 2<sup>nd</sup> stage of labour (10cm to delivery) \_\_\_\_\_ / \_\_\_\_\_ hours / mins 99 Unknown  
4 3<sup>rd</sup> stage of labour (delivery of baby to delivery of placenta) \_\_\_\_\_ / \_\_\_\_\_ hours / mins 99 Unknown

42) **Final Mode of Delivery:**

- First Baby 1 Vaginal Delivery - Cephalic / Breech (circle one) 4 Laparotomy (Uterine Rupture)  
 2 Instrumental Delivery – Ventouse / Forceps 5 Other (Specify) \_\_\_\_\_  
 3 Caesarean section (a) Planned \_\_\_\_\_  
 (b) Emergency 66 Undelivered  
 Indication for C/S \_\_\_\_\_ 99 Unknown  
 Twin 2 Choose number (from above) \_\_\_\_\_ 99 Unknown  
 Triplet 3 Choose number (from above) \_\_\_\_\_ 99 Unknown  
 55 Miscarriage / Termination (circle one) \_\_\_\_\_/40

43) **Were there any Pregnancy or Labour Complications** (circle all that apply):

- |                                  |                           |                                  |
|----------------------------------|---------------------------|----------------------------------|
| 1 Premature ROM                  | 10 Prolonged labour       | 18 Oligohydramnios               |
| 2 Prolonged ROM                  | 11 Obstructed labour      | 19 Polyhydramnios                |
| 3 Premature labour               | 12 Malpresentation        | 20 Fetal distress                |
| 4 Placenta praevia               | 13 Shoulder dystocia      | 21 Meconium stained liquor       |
| 5 Placenta abruptio              | 14 Postpartum haemorrhage | 22 Ectopic / abdominal pregnancy |
| 6 Antepartum haemorrhage         | 15 Uterine rupture        | 23 Septic miscarriage            |
| 7 Hypertension (no preeclampsia) | 16 Cord Prolapse          | 24 Other (Specify) _____         |
| 8 Preeclampsia / Eclampsia       | 17 Maternal infection/s   |                                  |
| 9 Diabetes / Gestational DM      |                           | 25 None                          |
|                                  |                           | 99 Unknown                       |

44) **Interventions around the time of Delivery and/or Maternal Death:** (circle all that apply)

|                 |    |                                    |    |                                              |
|-----------------|----|------------------------------------|----|----------------------------------------------|
| Early Pregnancy | 1  | ERPOC / MVA                        | 6  | Hysterotomy                                  |
|                 | 2  | Laparotomy                         | 7  | Hysterectomy                                 |
|                 | 3  | Laparoscopy                        | 8  | Blood Transfusion                            |
|                 | 4  | Myomectomy                         |    |                                              |
|                 | 5  | Salpingectomy                      | 99 | Unknown                                      |
| Antenatal       | 1  | Blood Transfusion                  | 2  | Tocolysis                                    |
|                 |    |                                    | 99 | Unknown                                      |
| Intrapartum     | 1  | Induction of Labour                | 4  | Caesarean Section                            |
|                 | 2  | Augmentation of Labour             | 5  | Blood Transfusion                            |
|                 | 3  | Instrumental Delivery              | 99 | Unknown                                      |
| Postpartum      | 1a | Oxytocin                           | 4  | Manual removal of placenta                   |
|                 | 1b | Tranexamic acid                    | 5  | Balloon Tamponade                            |
|                 | 1c | Ergometrine                        | 6  | Laparotomy                                   |
|                 | 1d | Misoprostol                        | 7  | B-Lynch suture                               |
|                 | 1e | Carbetocin                         | 8  | Hysterectomy                                 |
|                 | 2a | Surgical repair of perineal trauma | 9  | Blood Transfusion/s                          |
|                 | 2b | Surgical repair of cervical trauma | 10 | Other _____                                  |
|                 | 3  | ERPOC                              | 99 | Unknown                                      |
|                 |    |                                    |    |                                              |
| Other           | 1  | Local Anaesthesia                  | 6  | MgSO <sub>4</sub> (AN / Intra / Post partum) |
|                 | 2  | Epidural                           | 7  | Invasive Monitoring                          |
|                 | 3  | General Anaesthesia                | 8  | Ventilation / CPAP                           |
|                 | 4  | Spinal Anaesthesia                 | 9  | Other _____                                  |
|                 | 5  | Conscious Sedation                 | 99 | Unknown                                      |

45) **Did complications require above interventions?** 1 Yes \_\_\_\_\_ 2 No \_\_\_\_\_

46) **Did above intervention result in complication?** 1 Yes \_\_\_\_\_ 2 No \_\_\_\_\_

47) Summarize the interventions and/or complications resulting from interventions

---



---



---



---

48) Treatment (include drugs/dosage, surgery etc): (relevant to cause of death and contributing morbidity)

---



---



---



---

### E. Pregnancy outcome\*

(\*skip this section when pregnancy outcome is miscarriage or termination)

49) **Pregnancy outcome:** (circle one - if more than triplets, please add details at bottom of page)

|            |                                      |                                        |            |
|------------|--------------------------------------|----------------------------------------|------------|
| First Baby | 1 Live Birth                         | 2 Stillbirth: Antepartum / Intrapartum | 99 Unknown |
|            | 3 Baby alive on admission?           | Yes / No                               | 99 Unknown |
| Twin 2     | Choose number 1-3 (from above) _____ |                                        | 99 Unknown |
| Triplet 3  | Choose number 1-3 (from above) _____ |                                        | 99 Unknown |

50) **Apgar Scores:** (for stillbirths indicate O and O / for miscarriage and termination, skip to Section F)

|            |             |              |              |            |
|------------|-------------|--------------|--------------|------------|
| First Baby | _____ 1min; | _____ 5 min; | _____ 10 min | 99 Unknown |
| Twin 2     | _____ 1min; | _____ 5 min; | _____ 10 min | 99 Unknown |
| Triplet 3  | _____ 1min; | _____ 5 min; | _____ 10 min | 99 Unknown |

51) **Sex & Birth measurements:**

|            |            |             |                 |             |            |
|------------|------------|-------------|-----------------|-------------|------------|
| First Baby | Sex: M / F | _____ grams | Length _____ cm | HC _____ cm | 99 Unknown |
| Twin 2     | Sex: M / F | _____ grams | Length _____ cm | HC _____ cm | 99 Unknown |
| Triplet 3  | Sex: M / F | _____ grams | Length _____ cm | HC _____ cm | 99 Unknown |

### F. Maternal Death Details

52) **Death details:** (for stillbirths indicate data and time of Birth)

|        |                                    |            |
|--------|------------------------------------|------------|
| 1 Date | _____ / _____ / _____ (dd/mm/yyyy) | 99 Unknown |
| 2 Time | _____ h _____                      | 99 Unknown |

53) **Timing of maternal death:**

|                                                              |                                                  |
|--------------------------------------------------------------|--------------------------------------------------|
| 1 Early Pregnancy (<20 weeks)                                | 4 Postpartum (>12hrs - 72 hrs after delivery)    |
| 2 Late Pregnancy (>20 weeks)                                 | 5 Postpartum (>72 hrs to 42 days after delivery) |
| 3 Intrapartum (during labour or within 12 hours of delivery) | 99 Unknown (but during pregnancy or <42days)     |

54) **Place where death occurred:**

|                              |                                     |                               |
|------------------------------|-------------------------------------|-------------------------------|
| 1 Before arrival             | 3 After admission: ANW/ Labour /PNW | 5 After admission: Gynae ward |
| 2 At arrival / during triage | 4 After admission: ICU / ACU        | 6 Other _____                 |

55) **Manner of Death**

|           |                      |                            |
|-----------|----------------------|----------------------------|
| 1 Disease | 4 Accident           | 7 Pending investigation    |
| 2 Assault | 5 Legal intervention | 88 Could not be determined |
|           | 6 War                | 99 Unknown / Unclear       |

**PLEASE NOTE:** WHO (2016) clearly differentiates between the following:

**Cause of death:** the disease, injury or complication directly *RESULTING* in death (ultimate consequence)

**Underlying cause:** the disease or injury *INITIATING* the sequence of events leading to death or fatal injury

**Manner of death:** the circumstances in which a death occurred

**Mode of death:** comprises conditions such as heart failure, cardiac arrest, shock, brain failure, hepatic failure, renal failure – these generally do NOT occur *without* initiating or precipitating causes or illnesses

56) **Maternal death classification:**

Use the table below (WHO, ICD 10MM) to determine the underlying cause of death by choosing the Type, Group and underlying cause of death (select only the most appropriate underlying cause)

| Type                             | Group                                        | Underlying Cause (select only ONE)                                                                                                                                                                                                                                                                                                                                                               |
|----------------------------------|----------------------------------------------|--------------------------------------------------------------------------------------------------------------------------------------------------------------------------------------------------------------------------------------------------------------------------------------------------------------------------------------------------------------------------------------------------|
| Maternal Death:<br><b>DIRECT</b> | A. Pregnancies with abortive outcomes        | 1) Septic miscarriage<br>2) Haemorrhage (non-trauma)<br>3) Uterine trauma<br>4) Gestational trophoblastic disease (GTD)<br>5) Following legal TOP<br>6) Ectopic < 20 weeks<br>7) Ectopic > 20 weeks                                                                                                                                                                                              |
|                                  | B. Hypertensive Disorders                    | 8) Chronic hypertension<br>9) Pre-eclampsia<br>10) Eclampsia<br>11) HELLP<br>12) Liver rupture                                                                                                                                                                                                                                                                                                   |
|                                  | C. Obstetric Haemorrhage                     | 13) Abruptio with hypertension<br>14) Abruptio without hypertension<br>15) Placenta praevia<br>16) Other APH<br>17) Ruptured uterus with previous CS<br>18) Ruptured uterus without previous CS<br>19) Retained placenta<br>20) Morbidly adherent placenta<br>21) Uterine atony<br>22) Vaginal trauma<br>23) Cervical trauma<br>24) Bleeding during CS<br>25) Bleeding after CS<br>26) Other PPH |
|                                  | D. Pregnancy related infection               | 27) Chorioamnionitis (ruptured membranes)<br>28) Chorioamnionitis (intact membranes)<br>29) Puerperal sepsis after vaginal delivery<br>30) Puerperal sepsis after CS<br>31) Bowel trauma at CS<br>32) Bladder trauma                                                                                                                                                                             |
| Maternal Death:<br><b>DIRECT</b> | E. Other obstetric complications             | 33) Amniotic fluid embolism<br>34) Pulmonary embolism<br>35) Hyperemesis gravidarum<br>36) Acute fatty liver<br>37) Maternal suicide                                                                                                                                                                                                                                                             |
|                                  | F. Unanticipated complications of management | 38) Anaesthetic complications (general)<br>39) Anaesthetic complications (spinal)<br>40) Drug related complications<br>a) Antibiotics (e.g. Penicillin)<br>b) MgSO <sub>4</sub>                                                                                                                                                                                                                  |

| Type                                                                  | Group                           | Underlying Cause (select only ONE)                                                                                                                                                                                                                                                                                                                                                                                                                                                                                                                                                                                                                                                                                                    |
|-----------------------------------------------------------------------|---------------------------------|---------------------------------------------------------------------------------------------------------------------------------------------------------------------------------------------------------------------------------------------------------------------------------------------------------------------------------------------------------------------------------------------------------------------------------------------------------------------------------------------------------------------------------------------------------------------------------------------------------------------------------------------------------------------------------------------------------------------------------------|
|                                                                       |                                 | c) Opioids<br>d) Insulin<br>e) ARV medication<br>f) TB medication<br>g) Herbal medication<br>h) Other medication<br>41) Blood transfusion reaction                                                                                                                                                                                                                                                                                                                                                                                                                                                                                                                                                                                    |
| Maternal Death:<br><b>INDIRECT</b>                                    | G. Non-obstetric complications  | 42) Cardiac disease<br>43) Endocrine conditions<br>44) Gastrointestinal tract conditions<br>45) Central nervous system conditions<br>46) Respiratory conditions<br>47) Genitourinary conditions<br>48) Renal disease<br>49) Liver disease<br>50) Autoimmune disorders<br>51) Skeletal diseases<br>52) Psychiatric disorders<br>53) Neoplasms<br>54) Infections that are not a direct result of pregnancy<br>a) PCP pneumonia<br>b) Other Pneumonia<br>c) TB<br>d) Endocarditis<br>e) UTI<br>f) Malaria<br>g) Cryptococcal meningitis<br>h) Other meningitis<br>i) Toxoplasmosis<br>j) Hepatitis<br>k) Gastroenteritis<br>l) Wasting syndrome<br>m) Other<br>n) Disease outbreak or related complications (e.g. Cholera, Covid-19 etc) |
| Maternal Death:<br><b>UNSPECIFIED</b>                                 | H. Unknown /<br>I. Undetermined | 55) Death at home or outside health services<br>56) No cause found<br>57) Incomplete history / lack of information<br>58) Missing file / records unavailable                                                                                                                                                                                                                                                                                                                                                                                                                                                                                                                                                                          |
| Maternal Death:<br><b>During pregnancy, childbirth and puerperium</b> | J. Coincidental Cause           | 59) Motor Vehicle Accident<br>60) Other accidents (e.g. drowning, falling etc.)<br>61) Assault<br>99) Other                                                                                                                                                                                                                                                                                                                                                                                                                                                                                                                                                                                                                           |

57) **Cause of Death:** (sequence of events leading up to death)

Immediate CAUSE/ disease/ injury/ complication directly leading to death on line (a)

a) \_\_\_\_\_  
 ↗ secondary to (as a consequence of) (b) below

Disease/injury/complication leading to (a) above

b) \_\_\_\_\_  
 ↗ secondary to (as a consequence of) (c) below

Disease/injury/complication leading to (b) above

c) \_\_\_\_\_

Other contributing morbidity \_\_\_\_\_



## G. Modifiable Factors

Use the table below to indicate all applicable avoidable factors. Where "Yes" is ticked, provide further details

### 58) Woman /Family / Community related modifiable factors:

| Factor                                                                       | No | Yes | Un known | Details (if yes) |
|------------------------------------------------------------------------------|----|-----|----------|------------------|
| 1. No Antenatal Care                                                         |    |     |          |                  |
| 2. Infrequent Antenatal Care                                                 |    |     |          |                  |
| 3. Delay in seeking care                                                     |    |     |          |                  |
| 4. Declined treatment or admission                                           |    |     |          |                  |
| 5. Unsafe termination of pregnancy                                           |    |     |          |                  |
| 6. Use of herbal oxytocics                                                   |    |     |          |                  |
| 7. Use of other traditional medicine/s                                       |    |     |          |                  |
| 8. No healthcare access due to Disease outbreak / Extreme weather / Conflict |    |     |          |                  |

### 59) Health System related (Administrative) modifiable factors:

| Factor                                                                        | No | Yes | Un known | Details (if yes) |
|-------------------------------------------------------------------------------|----|-----|----------|------------------|
| 9. Lack of transport (home to facility)                                       |    |     |          |                  |
| 10. Lack of transport (between facilities)                                    |    |     |          |                  |
| 11. Lack of accessibility                                                     |    |     |          |                  |
| 12. Delay in initiating critical care (overburdened facility)                 |    |     |          |                  |
| 13. Communication breakdown (between healthcare workers)                      |    |     |          |                  |
| 14. Lack of facilities, equipment or consumables<br>Specify:                  |    |     |          |                  |
| 15. Lack of human resources (health care workers, incl. ambulance personnel)  |    |     |          |                  |
| 16. Lack of expertise, training or education                                  |    |     |          |                  |
| 17. Lack of Specialist                                                        |    |     |          |                  |
| 18. Service interruption due to Disease outbreak / Extreme weather / Conflict |    |     |          |                  |
| 19. Other                                                                     |    |     |          |                  |

### 60) Health Worker related modifiable factors:

| Factor                                                          | No | Yes | Un known | Details (if yes) |
|-----------------------------------------------------------------|----|-----|----------|------------------|
| 20. Incorrect / Poor documentation of care                      |    |     |          |                  |
| 21. Labour care guide not used or incomplete                    |    |     |          |                  |
| 22. Delay in initiating critical care (failure to act promptly) |    |     |          |                  |
| 23. Delay in referring patient                                  |    |     |          |                  |
| 24. Managed at inappropriate level                              |    |     |          |                  |
| 25. Problem with recognition / diagnosis                        |    |     |          |                  |
| 26. Incorrect diagnoses (resulting in incorrect management)     |    |     |          |                  |
| 27. Treatment not provided                                      |    |     |          |                  |

| Factor                                                        | No | Yes | Un known | Details (if yes) |
|---------------------------------------------------------------|----|-----|----------|------------------|
| 28. Incorrect treatment or management (but correct diagnosis) |    |     |          |                  |
| 29. Sub-standard management (but correct diagnosis)           |    |     |          |                  |
| 30. Not monitored / infrequently monitored                    |    |     |          |                  |
| 31. Prolonged abnormal monitoring but no action taken         |    |     |          |                  |
| 32. Inappropriate discharge                                   |    |     |          |                  |
| 33. Other                                                     |    |     |          |                  |

61) *Was an Autopsy performed:*

1 Yes (if yes, specify results)      2 No      99 Unknown

---



---



---

**H. Case Summary**

Please summarize important information, findings and actions relating to the case

---



---



---



---



---



---



---



---



---



---



---



---

**I. Conclusion**

Would the outcome have changed with improved care?

1. NO, good care was provided
2. NO, improvements to care may have made NO difference to outcome
3. YES, (preventable) improvements to care may have made a difference to outcome

Form completed by:

Full Name \_\_\_\_\_ Rank \_\_\_\_\_

Cell phone \_\_\_\_\_

email \_\_\_\_\_

Signature \_\_\_\_\_ Date \_\_\_\_\_
